# Supplementary material for: Locally dose-escalated radiotherapy may improve intracranial local control and overall survival among patients with glioblastoma
Source: Springer Nature journal article supplement (doi:10.1186/s13014-018-1194-8), 2018-12-01

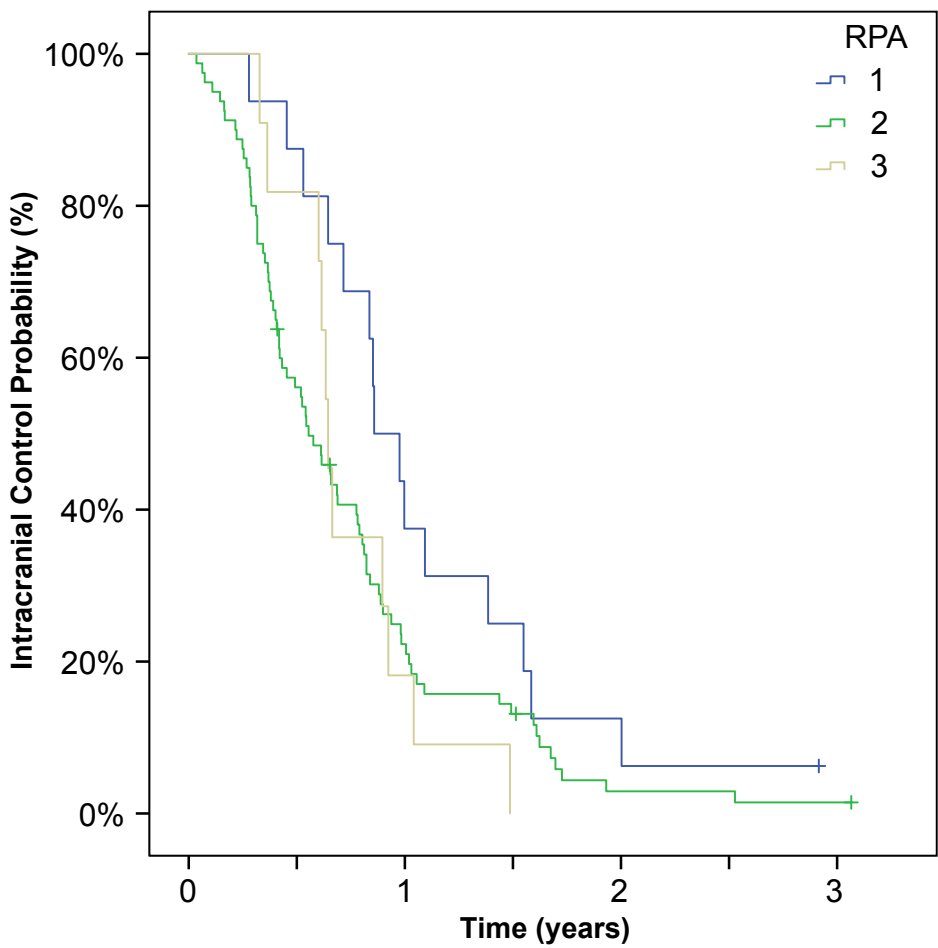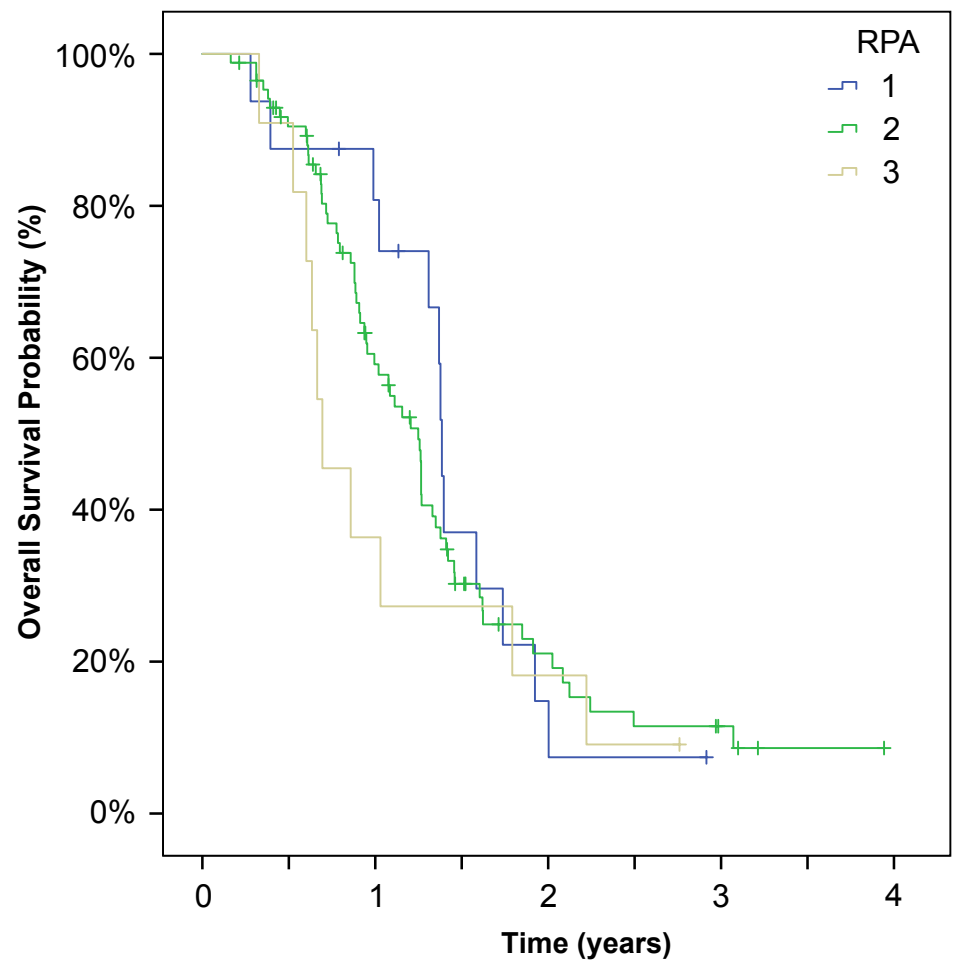

Supplement: MOESM3 [file 16353682]
